# Supplementary material
Source: PubMed Central journal article supplement (PMC6449149)
Supplement: NIHMS1009288-supplement-Supplemental_Table_2.pdf [file NIHMS1009288-supplement-Supplemental_Table_2.pdf]

**Supplemental Table 2.** Additional Medical History and Interventions

|                              | <b>age 18-49 (n/total available)</b> | <b>age ≥ 50 (n/total available)</b> | <b>P value</b>    |
|------------------------------|--------------------------------------|-------------------------------------|-------------------|
| <b>Smoking</b>               |                                      |                                     |                   |
| Ever smoker                  | 33.3% (202/607)                      | 41.6% (32/77)                       | 0.09              |
| Current smoker               | 21.2% (128/603)                      | 9.1% (7/77)                         | <b>0.02</b>       |
| Either parent smoker         | 63.7% (373/586)                      | 50.7% (35/69)                       | <b>0.03</b>       |
| <b>Sickle Cell Genotype</b>  |                                      |                                     |                   |
| Hb SS                        | 81.3% (512/630)                      | 74.7% (59/79)                       |                   |
| Hb Sβ <sup>0</sup>           | 4.0% (25/630)                        | 6.3% (5/79)                         |                   |
| Hb SC                        | 10.3% (65/630)                       | 16.5% (13/79)                       |                   |
| Hb Sβ <sup>+</sup>           | 4.4% (28/630)                        | 2.5% (2/79)                         |                   |
| Proteinuria                  | 23.8% (118/496)                      | 46.9% (30/64)                       | <b>&lt;0.0001</b> |
| Leg Ulcers                   | 21.1% (111/525)                      | 36.1% (26/72)                       | <b>0.004</b>      |
| Any avascular necrosis (AVN) | 27.1% (142/524)                      | 47.2% (34/72)                       | <b>0.0006</b>     |
| AVN hips                     | 24.3% (128/128)                      | 36.6% (26/71)                       | <b>0.03</b>       |
| Hip replacement              | 7.7% (32/414)                        | 33.3% (20/60)                       | <b>&lt;0.0001</b> |
| AVN shoulders                | 14.3% (75/523)                       | 27.8% (20/72)                       | <b>0.004</b>      |
| Shoulder replacement         | 2.7% (11/408)                        | 1.7% (1/60)                         | 0.63              |
| Gallstones                   | 59.3% (316/533)                      | 69.9% (51/73)                       | 0.15              |
| Cholecystectomy              | 63.3% (269/425)                      | 71.0% (44/62)                       | 0.30              |
| Splenomegaly                 | 2.0% (9/452)                         | 0.0% (0/66)                         | 0.96              |
| Splenectomy                  | 11.6% (48/414)                       | 13.1% (8/61)                        | 0.71              |
| Priapism                     | 36.7% (91/248)                       | 29.2% (7/24)                        | 0.47              |
| Abnormal Neurologic Exam     | 3.2% (14/440)                        | 4.5% (3/67)                         | 0.62              |
| Hepatomegaly                 | 3.6% (16/450)                        | 4.4% (3/68)                         | 0.70              |
| Edema 1+ or more             | 7.7% (35/456)                        | 19.7% (13/66)                       | <b>0.003</b>      |
| Any leg ulcer                | 6.1% (27/442)                        | 10.3% (7/68)                        | 0.19              |
