# Supplementary material
Source: PubMed Central journal article supplement (PMC6449149)
Supplement: NIHMS1009288-supplement-Supplemental_Table__1.pdf [file NIHMS1009288-supplement-Supplemental_Table__1.pdf]

**Supplemental Table 1.** Baseline Laboratory Findings

|                                        | Patients on Hydroxyurea     |                            |              | Patients not on Hydroxyurea |                            |               |
|----------------------------------------|-----------------------------|----------------------------|--------------|-----------------------------|----------------------------|---------------|
|                                        | Mean value<br>age 18-49 (n) | Mean value<br>age ≥ 50 (n) | P value      | Mean value<br>age 18-49 (n) | Mean value<br>age ≥ 50 (n) | P value       |
| Hemoglobin (g/dL)                      | 10.1 (176)                  | 9.8 (20)                   | 0.35         | 10.1 (243)                  | 9.5 (46)                   | <b>0.006</b>  |
| WBC <sup>1</sup> (x10 <sup>9</sup> /L) | 10.6 (177)                  | 8.7 (20)                   | <b>0.05</b>  | 11.9 (245)                  | 9.5 (46)                   | <b>0.0001</b> |
| Platelets (x10 <sup>9</sup> /L)        | 426 (176)                   | 327 (20)                   | <b>0.007</b> | 383 (246)                   | 343 (45)                   | 0.08          |
| MCV <sup>2</sup> (fL)                  | 100 (177)                   | 104 (20)                   | 0.18         | 87 (246)                    | 87 (46)                    | 0.88          |

<sup>1</sup>WBC –white blood cell; <sup>2</sup>MCV- mean corpuscular volume
