# Supplementary material
Source: PubMed Central journal article supplement (PMC6449149)

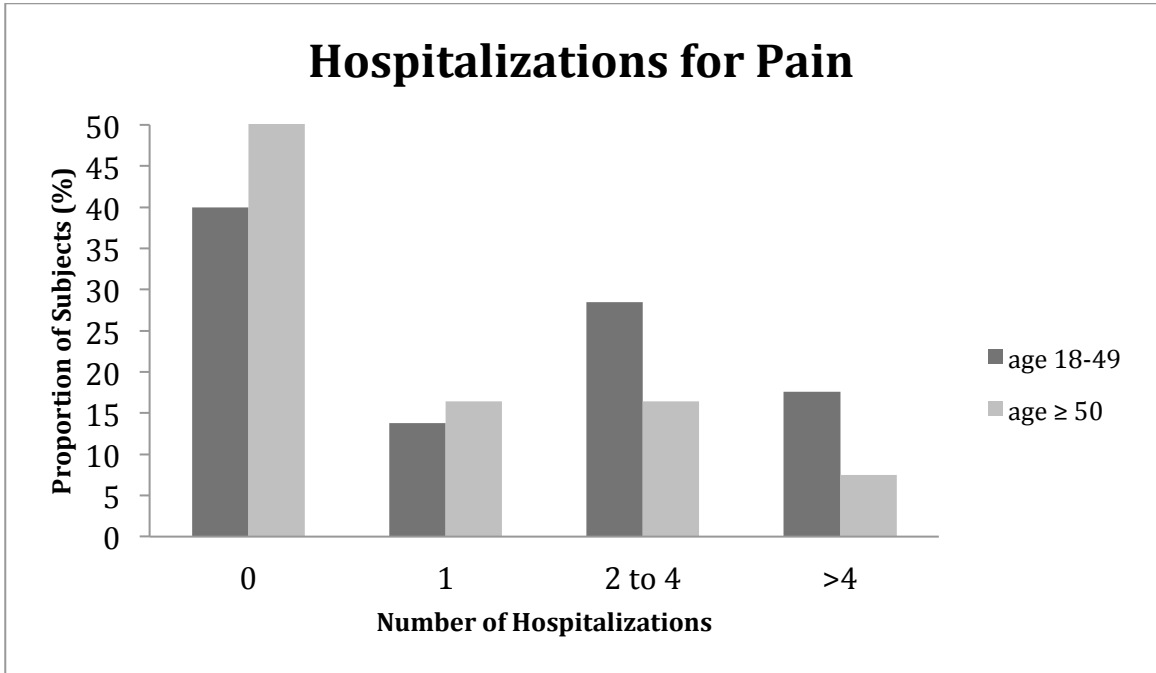

**Figure 2.** Hospitalizations for Pain in the last 12 months

Supplement: NIHMS1009288-supplement-Supplemental_Figure_1.pdf [file NIHMS1009288-supplement-Supplemental_Figure_1.pdf]

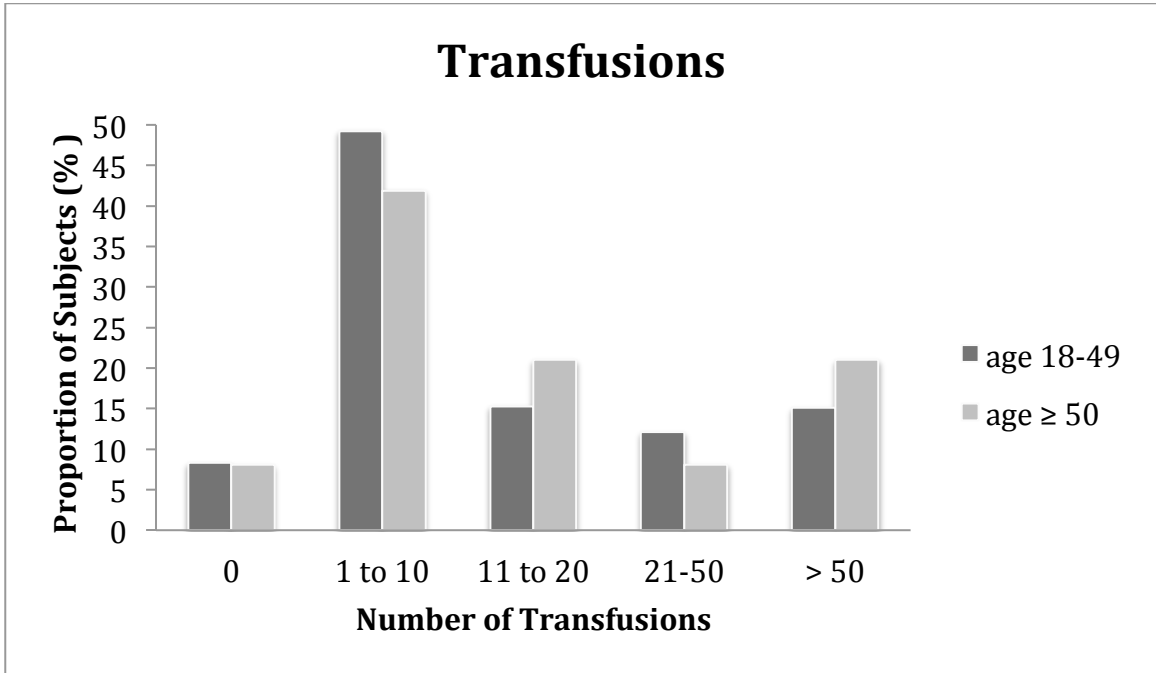

**Figure 3.** Lifetime Transfusion History

Supplement: NIHMS1009288-supplement-Supplemental_Figure_2.pdf [file NIHMS1009288-supplement-Supplemental_Figure_2.pdf]
